# Supplementary material
Source: PubMed Central journal article supplement (PMC4703450)
Supplement: NIHMS709278-supplement-Supplemental_Tables.pdf [file NIHMS709278-supplement-Supplemental_Tables.pdf]

SUPPLEMENTAL MATERIAL

Table S1. Percent Person-years for each Calendar Year (2005-2011) by Diabetes Status and Population Subgroups

|                                  | Calendar Year |         |         |         |         |         |         |
|----------------------------------|---------------|---------|---------|---------|---------|---------|---------|
|                                  | 2005          | 2006    | 2007    | 2008    | 2009    | 2010    | 2011    |
| <b>Diabetes</b>                  |               |         |         |         |         |         |         |
| Total Population                 | 610,672       | 651,285 | 688,205 | 720,784 | 754,753 | 792,159 | 826,392 |
| Age Group                        |               |         |         |         |         |         |         |
| 20-44 years                      | 74,759        | 77,962  | 81,410  | 83,995  | 85,457  | 86,508  | 87,776  |
| 45-64 years                      | 294,102       | 315,673 | 336,373 | 352,800 | 367,102 | 380,989 | 392,111 |
| ≥ 65 years                       | 241,811       | 257,651 | 270,421 | 283,990 | 302,193 | 324,662 | 346,505 |
| Sex                              |               |         |         |         |         |         |         |
| Men                              | 318,443       | 338,944 | 357,455 | 374,034 | 391,561 | 410,788 | 427,596 |
| Women                            | 292,229       | 312,341 | 330,750 | 346,751 | 363,192 | 381,371 | 398,796 |
| Race/Ethnicity                   |               |         |         |         |         |         |         |
| White                            | 287,298       | 304,651 | 320,366 | 334,113 | 349,739 | 366,783 | 379,302 |
| Hispanic                         | 109,816       | 121,029 | 132,119 | 141,451 | 149,649 | 159,109 | 169,192 |
| Black                            | 65,950        | 69,968  | 73,565  | 77,020  | 80,822  | 85,014  | 89,174  |
| Asian                            | 61,714        | 67,501  | 73,721  | 79,344  | 84,914  | 91,252  | 97,326  |
| Native Hawaiian/Pacific Islander | 4,933         | 5,451   | 5,933   | 6,311   | 6,707   | 7,242   | 7,830   |
| American Indian/Alaskan Native   | 2,730         | 2,953   | 3,188   | 3,359   | 3,580   | 3,780   | 4,003   |
| More than One Race               | 4,840         | 5,382   | 5,865   | 6,326   | 6,861   | 7,416   | 7,877   |
| Unknown Race                     | 73,390        | 74,350  | 73,448  | 72,860  | 72,480  | 71,563  | 71,687  |
| Medicaid Coverage                | 13,910        | 14,789  | 26,193  | 28,127  | 29,813  | 31,920  | 34,879  |
| Other Coverage                   | 596,761       | 636,496 | 662,011 | 692,657 | 724,940 | 760,240 | 791,513 |
| Prior CVD History                | 150,682       | 149,953 | 149,797 | 149,716 | 150,884 | 152,771 | 154,595 |
| No History of CVD                | 459,990       | 501,332 | 538,408 | 571,068 | 603,869 | 639,388 | 671,797 |
| <b>No Diabetes</b>               |               |         |         |         |         |         |         |
| Total Population                 | 609,709       | 643,527 | 674,212 | 704,642 | 736,710 | 770,549 | 802,050 |
| Age Group                        |               |         |         |         |         |         |         |

|                                  |         |         |         |         |         |         |         |
|----------------------------------|---------|---------|---------|---------|---------|---------|---------|
| 20-44 years                      | 82,172  | 81,889  | 83,223  | 84,412  | 84,789  | 85,109  | 86,059  |
| 45-64 years                      | 297,220 | 314,832 | 332,156 | 346,913 | 360,685 | 373,228 | 383,228 |
| ≥ 65 years                       | 230,318 | 246,806 | 258,833 | 273,318 | 291,236 | 312,212 | 332,762 |
|                                  |         |         |         |         |         |         |         |
| Sex                              |         |         |         |         |         |         |         |
| Men                              | 315,679 | 332,092 | 346,953 | 362,045 | 377,658 | 394,606 | 409,977 |
| Women                            | 294,030 | 311,435 | 327,258 | 342,597 | 359,052 | 375,944 | 392,073 |
|                                  |         |         |         |         |         |         |         |
| Race/Ethnicity                   |         |         |         |         |         |         |         |
| White                            | 348,769 | 369,649 | 388,740 | 406,988 | 427,182 | 449,080 | 465,609 |
| Hispanic                         | 67,873  | 74,030  | 80,379  | 86,283  | 91,365  | 97,375  | 103,820 |
| Black                            | 43,858  | 46,798  | 49,633  | 52,488  | 55,451  | 58,230  | 60,523  |
| Asian                            | 46,394  | 50,249  | 54,039  | 57,662  | 61,313  | 65,355  | 69,552  |
| Native Hawaiian/Pacific Islander | 2,472   | 2,693   | 2,874   | 3,041   | 3,231   | 3,449   | 3,583   |
| American Indian/Alaskan Native   | 1,828   | 1,930   | 2,060   | 2,186   | 2,328   | 2,471   | 2,606   |
| More than One Race               | 2,994   | 3,282   | 3,594   | 3,870   | 4,197   | 4,474   | 4,753   |
| Unknown Race                     | 95,521  | 94,896  | 92,892  | 92,124  | 91,643  | 90,115  | 91,603  |
|                                  |         |         |         |         |         |         |         |
| Medicaid Coverage                | 7,339   | 7,527   | 12,435  | 13,147  | 13,748  | 14,439  | 15,203  |
| Other Coverage                   | 602,370 | 636,000 | 661,777 | 691,496 | 722,962 | 756,110 | 786,846 |
|                                  |         |         |         |         |         |         |         |
| Prior Cardiovascular History     | 84,843  | 85,003  | 85,369  | 86,525  | 88,518  | 91,303  | 93,975  |
| No History of CVD                | 524,867 | 558,524 | 588,842 | 618,118 | 648,192 | 679,246 | 708,075 |

Table S2. Annual rates of major cardiovascular events and all-cause mortality from 2005 through 2011 for persons with and without diabetes, overall and by sex. Age- and sex-adjusted to the 2010 U.S. Census population where appropriate.

| Outcome              | Rates per 1,000 person*years |      |      |      |      |      |      | 2005 to 2011<br>Events<br>difference per<br>1,000 p*y | Poisson Annual<br>Relative Rate<br>Change<br>(95% CI) | 2005 to 2011<br>Relative<br>Reduction<br>(%) | Test for<br>Trend<br>(p-value) |
|----------------------|------------------------------|------|------|------|------|------|------|-------------------------------------------------------|-------------------------------------------------------|----------------------------------------------|--------------------------------|
|                      | 2005                         | 2006 | 2007 | 2008 | 2009 | 2010 | 2011 |                                                       |                                                       |                                              |                                |
| <b>AMI/ACS</b>       |                              |      |      |      |      |      |      |                                                       |                                                       |                                              |                                |
| <b>Diabetes</b>      |                              |      |      |      |      |      |      |                                                       |                                                       |                                              |                                |
| Overall              | 6.59                         | 6.17 | 5.63 | 5.27 | 4.71 | 4.49 | 4.40 | 2.19                                                  | -7.0 (-8.1, -5.9)                                     | 35.5                                         | <0.0001                        |
| Men                  | 8.1                          | 7.50 | 6.93 | 6.46 | 5.9  | 5.65 | 5.55 | 2.55                                                  | -6.4 (-7.4, -5.4)                                     | 33.0                                         | <0.0001                        |
| Women                | 5.28                         | 5.03 | 4.50 | 4.23 | 3.67 | 3.51 | 3.42 | 1.86                                                  | -7.6 (-9.2, -6.1)                                     | 37.9                                         | <0.0001                        |
|                      |                              |      |      |      |      |      |      |                                                       |                                                       |                                              |                                |
| <b>No Diabetes</b>   |                              |      |      |      |      |      |      |                                                       |                                                       |                                              |                                |
| Overall              | 2.43                         | 2.36 | 2.13 | 2.04 | 1.92 | 1.80 | 1.70 | 0.73                                                  | -6.0 (-7.3, -4.6)                                     | 30.9                                         | <0.0001                        |
| Men                  | 3.43                         | 3.34 | 3.01 | 2.97 | 2.66 | 2.63 | 2.45 | 0.98                                                  | -5.6 (-6.7, -4.5)                                     | 29.3                                         | <0.0001                        |
| Women                | 1.61                         | 1.54 | 1.38 | 1.26 | 1.29 | 1.11 | 1.08 | 0.53                                                  | -6.6 (-8.4, -4.7)                                     | 33.6                                         | <0.0001                        |
|                      |                              |      |      |      |      |      |      |                                                       |                                                       |                                              |                                |
| <b>Stroke</b>        |                              |      |      |      |      |      |      |                                                       |                                                       |                                              |                                |
| <b>Diabetes</b>      |                              |      |      |      |      |      |      |                                                       |                                                       |                                              |                                |
| Overall              | 4.7                          | 4.58 | 4.44 | 4.33 | 4.15 | 3.98 | 3.85 | 0.85                                                  | -3.4 (-3.9, -2.8)                                     | 18.6                                         | <0.0001                        |
| Men                  | 5.2                          | 4.81 | 4.85 | 4.64 | 4.42 | 4.12 | 4.17 | 1.03                                                  | -3.7 (-4.3, -3.2)                                     | 20.4                                         | <0.0001                        |
| Women                | 4.28                         | 4.41 | 4.09 | 4.09 | 3.95 | 3.86 | 3.59 | 0.69                                                  | -3.0 (-3.7, -2.2)                                     | 19.8                                         | <0.0001                        |
|                      |                              |      |      |      |      |      |      |                                                       |                                                       |                                              |                                |
| <b>No Diabetes</b>   |                              |      |      |      |      |      |      |                                                       |                                                       |                                              |                                |
| Overall              | 2.21                         | 2    | 2.1  | 2.08 | 1.95 | 1.98 | 1.86 | 0.35                                                  | -2.2 (-3.0, -1.5)                                     | 12.7                                         | <0.0001                        |
| Men                  | 2.49                         | 2.18 | 2.39 | 2.34 | 2.22 | 2.36 | 2.05 | 0.44                                                  | -1.7 (-2.8, -0.7)                                     | 10.0                                         | 0.0016                         |
| Women                | 1.98                         | 1.84 | 1.87 | 1.86 | 1.72 | 1.67 | 1.69 | 0.29                                                  | -2.7 (-3.5, -1.8)                                     | 14.9                                         | <0.0001                        |
|                      |                              |      |      |      |      |      |      |                                                       |                                                       |                                              |                                |
| <b>Heart Failure</b> |                              |      |      |      |      |      |      |                                                       |                                                       |                                              |                                |
| <b>Diabetes</b>      |                              |      |      |      |      |      |      |                                                       |                                                       |                                              |                                |
| Overall              | 9.11                         | 8.62 | 8    | 7.63 | 7.17 | 6.92 | 6.69 | 2.42                                                  | -5.2 (-5.7, -4.7)                                     | 27.5                                         | <0.0001                        |
| Men                  | 9.77                         | 9.48 | 8.57 | 8.1  | 7.85 | 7.5  | 7.38 | 2.39                                                  | -5.0 (-5.7, -4.2)                                     | 26.3                                         | <0.0001                        |
| Women                | 8.53                         | 7.88 | 7.57 | 7.27 | 6.62 | 6.4  | 6.14 | 2.39                                                  | -5.4 (-6.0, -4.8)                                     | 28.4                                         | <0.0001                        |
|                      |                              |      |      |      |      |      |      |                                                       |                                                       |                                              |                                |
| <b>No Diabetes</b>   |                              |      |      |      |      |      |      |                                                       |                                                       |                                              |                                |
| Overall              | 2.02                         | 2    | 1.91 | 1.91 | 1.75 | 1.78 | 1.71 | 0.31                                                  | -2.8 (-4.0, -1.7)                                     | 15.9                                         | <0.0001                        |
| Men                  | 2.52                         | 2.62 | 2.28 | 2.24 | 2.09 | 2.13 | 2.09 | 0.43                                                  | -3.8 (-5.5, -2.1)                                     | 20.7                                         | <0.0001                        |

|                            |       |       |       |       |       |       |      |      |                   |      |         |
|----------------------------|-------|-------|-------|-------|-------|-------|------|------|-------------------|------|---------|
| Women                      | 1.67  | 1.59  | 1.64  | 1.65  | 1.53  | 1.53  | 1.46 | 0.21 | -2.1 (-2.8, -1.3) | 11.7 | <0.0001 |
|                            |       |       |       |       |       |       |      |      |                   |      |         |
| <b>All-cause Mortality</b> |       |       |       |       |       |       |      |      |                   |      |         |
| <b>Diabetes</b>            |       |       |       |       |       |       |      |      |                   |      |         |
| Overall                    | 17.32 | 16.3  | 15.64 | 15.42 | 14.59 | 13.88 | ---  | 3.44 | -4.1 (-4.6, -3.6) | 20.4 | <0.0001 |
| Men                        | 19.37 | 18.5  | 17.54 | 17.59 | 16.36 | 15.55 | ---  | 3.82 | -4.1 (-4.4, -3.8) | 18.9 | <0.0001 |
| Women                      | 15.78 | 14.66 | 14.22 | 13.72 | 13.27 | 12.73 | ---  | 3.05 | -3.9 (-5.0, -2.9) | 18.2 | <0.0001 |
|                            |       |       |       |       |       |       |      |      |                   |      |         |
| <b>No Diabetes</b>         |       |       |       |       |       |       |      |      |                   |      |         |
| Overall                    | 9.3   | 8.98  | 8.65  | 8.32  | 7.9   | 7.79  | ---  | 1.51 | -3.7 (-4.8, -2.5) | 17.0 | <0.0001 |
| Men                        | 11.13 | 10.52 | 10.12 | 9.84  | 9.12  | 9.42  | ---  | 1.71 | -3.6 (-5.2, -2.0) | 16.8 | <0.0001 |
| Women                      | 7.97  | 7.89  | 7.56  | 7.17  | 7.05  | 6.59  | ---  | 1.38 | -3.8 (-4.5, -3.0) | 17.4 | <0.0001 |

Table S3. Annual rates of major cardiovascular events and all-cause mortality from 2005 through 2011 for persons with and without diabetes by history of a prior cardiovascular disease (CVD). Age- and sex-adjusted to the 2010 U.S. Census population.

| Outcome                    | Rates per 1,000 person*years |       |       |       |       |       |       | 2005 to 2011<br>Events<br>difference per<br>1,000 p*y | Poisson Annual<br>Relative Rate<br>Change<br>(95% CI) | 2005 to 2011<br>Relative<br>Reduction<br>(%) | Test for<br>Trend<br>(p-value) |
|----------------------------|------------------------------|-------|-------|-------|-------|-------|-------|-------------------------------------------------------|-------------------------------------------------------|----------------------------------------------|--------------------------------|
|                            | 2005                         | 2006  | 2007  | 2008  | 2009  | 2010  | 2011  |                                                       |                                                       |                                              |                                |
| <b>AMI/ACS</b>             |                              |       |       |       |       |       |       |                                                       |                                                       |                                              |                                |
| <b>Diabetes</b>            |                              |       |       |       |       |       |       |                                                       |                                                       |                                              |                                |
| Prior CVD                  | 15.8                         | 15.79 | 12.05 | 12.7  | 10.57 | 8.87  | 8.43  | 7.37                                                  | -10.5 (-12.2, -8.8)                                   | 48.7                                         | <0.0001                        |
| No CVD                     | 4.49                         | 4.36  | 4.06  | 3.87  | 3.55  | 3.45  | 3.51  | 0.98                                                  | -4.6 (-5.7, -3.6)                                     | 24.9                                         | <0.0001                        |
|                            |                              |       |       |       |       |       |       |                                                       |                                                       |                                              |                                |
| <b>No Diabetes</b>         |                              |       |       |       |       |       |       |                                                       |                                                       |                                              |                                |
| Prior CVD                  | 7.78                         | 4.47  | 5.37  | 4.29  | 4.64  | 3.69  | 3.56  | 4.22                                                  | -10.6 (-14.4, -6.6)                                   | 48.9                                         | <0.0001                        |
| No CVD                     | 1.86                         | 1.94  | 1.73  | 1.72  | 1.61  | 1.51  | 1.43  | 0.43                                                  | -4.7 (-6.2, -3.2)                                     | 25.2                                         | <0.0001                        |
|                            |                              |       |       |       |       |       |       |                                                       |                                                       |                                              |                                |
| <b>Stroke</b>              |                              |       |       |       |       |       |       |                                                       |                                                       |                                              |                                |
| <b>Diabetes</b>            |                              |       |       |       |       |       |       |                                                       |                                                       |                                              |                                |
| Prior CVD                  | 9.47                         | 9.29  | 8.28  | 9.13  | 7.79  | 7.7   | 6.66  | 2.81                                                  | -5.0 (-6.1, -4.0)                                     | 26.7                                         | <0.0001                        |
| No CVD                     | 3.34                         | 3.44  | 3.45  | 3.42  | 3.42  | 3.26  | 3.24  | 0.10                                                  | -0.8 (-1.6,-0.1)                                      | 4.9                                          | 0.0319                         |
|                            |                              |       |       |       |       |       |       |                                                       |                                                       |                                              |                                |
| <b>No Diabetes</b>         |                              |       |       |       |       |       |       |                                                       |                                                       |                                              |                                |
| Prior CVD                  | 4.31                         | 3.91  | 3.66  | 3.58  | 3.76  | 3.87  | 3.29  | 1.02                                                  | -2.8 (-4.6, -1.1)                                     | 15.9                                         | 0.0014                         |
| No CVD                     | 1.6                          | 1.6   | 1.76  | 1.75  | 1.63  | 1.7   | 1.62  | -0.02                                                 | 0.1 (-0.6, 0.8)                                       | 0.6                                          | 0.7722                         |
|                            |                              |       |       |       |       |       |       |                                                       |                                                       |                                              |                                |
| <b>Heart Failure</b>       |                              |       |       |       |       |       |       |                                                       |                                                       |                                              |                                |
| <b>Diabetes</b>            |                              |       |       |       |       |       |       |                                                       |                                                       |                                              |                                |
| Prior CVD                  | 38.71                        | 29.28 | 24.94 | 22.93 | 19.74 | 17.99 | 18.18 | 20.53                                                 | -12.3 (-16.7, -7.7)                                   | 54.5                                         | <0.0001                        |
| No CVD                     | 3.61                         | 4.26  | 4.14  | 4.25  | 4.26  | 4.31  | 4.31  | -0.70                                                 | 1.8 (0.8, 2.7)                                        | 11.3                                         | 0.0002                         |
|                            |                              |       |       |       |       |       |       |                                                       |                                                       |                                              |                                |
| <b>No Diabetes</b>         |                              |       |       |       |       |       |       |                                                       |                                                       |                                              |                                |
| Prior CVD                  | 5.99                         | 4.98  | 6.3   | 5.99  | 4.33  | 4.9   | 4.83  | 1.16                                                  | -3.7 (-5.0, -2.4)                                     | 20.2                                         | <0.0001                        |
| No CVD                     | 0.93                         | 1.05  | 1.05  | 1.12  | 1.05  | 1.07  | 1.15  | -0.22                                                 | 2.4 (1.0, 3.8)                                        | 15.3                                         | 0.0005                         |
|                            |                              |       |       |       |       |       |       |                                                       |                                                       |                                              |                                |
| <b>All-cause Mortality</b> |                              |       |       |       |       |       |       |                                                       |                                                       |                                              |                                |
| <b>Diabetes</b>            |                              |       |       |       |       |       |       |                                                       |                                                       |                                              |                                |
| Prior CVD                  | 44.71                        | 41.08 | 40.6  | 34.06 | 28.35 | 27.14 | ---   | 17.57                                                 | -10.1 (-11.2, -9.0)                                   | 41.2                                         | <0.0001                        |

|                    |       |       |       |       |       |       |     |      |                   |      |         |
|--------------------|-------|-------|-------|-------|-------|-------|-----|------|-------------------|------|---------|
| No CVD             | 11.17 | 11.63 | 11.47 | 11.64 | 11.34 | 10.94 | --- | 0.23 | -0.6 (-1.1, 0.0)  | 2.8  | 0.0332  |
|                    |       |       |       |       |       |       |     |      |                   |      |         |
| <b>No Diabetes</b> |       |       |       |       |       |       |     |      |                   |      |         |
| Prior CVD          | 18.86 | 15.43 | 14.75 | 16.34 | 13.14 | 12.98 | --- | 5.88 | -6.3 (-8.3, -4.2) | 27.7 | <0.0001 |
| No CVD             | 6.99  | 7.44  | 7.25  | 7.13  | 6.79  | 6.75  | --- | 0.24 | -1.4 (-3.0, 0.3)  | 6.8  | 0.1000  |

Table S4. Annual rates of major cardiovascular events and all-cause mortality from 2005 through 2011 for persons with and without diabetes by history of a prior cardiovascular disease (CVD). Age- and sex-adjusted to the 2010 U.S. Census population as appropriate.

| Outcome            | Rates per 1,000 person*years |      |      |      |      |      |      | 2005 to 2011<br>Events<br>difference<br>per 1,000 p*y | Poisson Annual<br>Relative Rate<br>Change<br>(95% CI) | 2005 to 2011<br>Relative<br>Reduction (%) | Test for<br>Trend<br>(p-value) |
|--------------------|------------------------------|------|------|------|------|------|------|-------------------------------------------------------|-------------------------------------------------------|-------------------------------------------|--------------------------------|
|                    | 2005                         | 2006 | 2007 | 2008 | 2009 | 2010 | 2011 |                                                       |                                                       |                                           |                                |
| <b>AMI/ACS</b>     |                              |      |      |      |      |      |      |                                                       |                                                       |                                           |                                |
| <b>20-44 years</b> |                              |      |      |      |      |      |      |                                                       |                                                       |                                           |                                |
| <b>Diabetes</b>    |                              |      |      |      |      |      |      |                                                       |                                                       |                                           |                                |
| Prior CVD          | 7.9                          | 10.3 | 3.7  | 6.7  | 4.2  | 2.3  | 2.0  | 5.9                                                   | -21.0 (-24.1, -17.8)                                  | -105.0                                    | <0.0001                        |
| No CVD             | 1.2                          | 1.2  | 1.1  | 1.1  | 1.1  | 1.0  | 1.1  | 0.1                                                   | -1.6 (-5.1, 2.1)                                      | -7.9                                      | 0.3885                         |
| <b>No Diabetes</b> |                              |      |      |      |      |      |      |                                                       |                                                       |                                           |                                |
| Prior CVD          | 5.7                          | 0.0  | 2.2  | 0.9  | 1.7  | 0.0  | 0.5  | 4.2                                                   | -33.7 (-58.5, 5.8)                                    | -168.6                                    | 0.0849                         |
| No CVD             | 0.2                          | 0.1  | 0.1  | 0.2  | 0.2  | 0.2  | 0.2  | 0.0                                                   | 2.4 (-4.5, 9.9)                                       | 12.1                                      | 0.5064                         |
| <b>45-64 years</b> |                              |      |      |      |      |      |      |                                                       |                                                       |                                           |                                |
| <b>Diabetes</b>    |                              |      |      |      |      |      |      |                                                       |                                                       |                                           |                                |
| Prior CVD          | 19.5                         | 17.4 | 15.9 | 15.4 | 13.9 | 11.8 | 11.2 | 8.3                                                   | -8.5 (-10.7, -6.2)                                    | -42.4                                     | <0.0001                        |
| No CVD             | 5.0                          | 5.0  | 4.6  | 4.4  | 4.1  | 4.1  | 3.8  | 1.2                                                   | -4.7 (-6.3, -3.0)                                     | -23.3                                     | <0.0001                        |
| <b>No Diabetes</b> |                              |      |      |      |      |      |      |                                                       |                                                       |                                           |                                |
| Prior CVD          | 7.0                          | 6.2  | 6.1  | 5.8  | 5.6  | 5.1  | 4.5  | 2.5                                                   | -6.1 (-9.6, -2.5)                                     | -30.6                                     | <0.0001                        |
| No CVD             | 1.9                          | 2.1  | 1.8  | 1.9  | 1.6  | 1.6  | 1.5  | 0.4                                                   | -4.5 (-5.7, -3.3)                                     | -22.7                                     | <0.0001                        |
| <b>65+ years</b>   |                              |      |      |      |      |      |      |                                                       |                                                       |                                           |                                |
| <b>Diabetes</b>    |                              |      |      |      |      |      |      |                                                       |                                                       |                                           |                                |
| Prior CVD          | 26.3                         | 24.1 | 23.8 | 21.8 | 19.1 | 19.3 | 17.9 | 8.4                                                   | -6.2 (-7.5, -4.9)                                     | -30.9                                     | <0.0001                        |
| No CVD             | 11.0                         | 10.2 | 9.7  | 9.1  | 8.2  | 8.0  | 8.3  | 2.7                                                   | -5.2 (-6.4, -3.9)                                     | -25.9                                     | <0.0001                        |
| <b>No Diabetes</b> |                              |      |      |      |      |      |      |                                                       |                                                       |                                           |                                |
| Prior CVD          | 12.4                         | 11.7 | 11.0 | 9.7  | 9.4  | 9.3  | 8.8  | 3.6                                                   | -5.7 (-7.2, -4.1)                                     | -28.5                                     | <0.0001                        |
| No CVD             | 5.5                          | 5.7  | 5.3  | 5.0  | 4.8  | 4.3  | 4.1  | 1.4                                                   | -5.4 (-6.9, -4.0)                                     | -27.2                                     | <0.0001                        |
| <b>Stroke</b>      |                              |      |      |      |      |      |      |                                                       |                                                       |                                           |                                |
| <b>20-44 years</b> |                              |      |      |      |      |      |      |                                                       |                                                       |                                           |                                |
| <b>Diabetes</b>    |                              |      |      |      |      |      |      |                                                       |                                                       |                                           |                                |
| Prior CVD          | 3.1                          | 3.5  | 2.4  | 5.4  | 3.6  | 3.3  | 1.4  | 1.7                                                   | -4.8 (-10.3, 1.0)                                     | -24.1                                     | 0.1049                         |
| No CVD             | 1.0                          | 0.8  | 0.7  | 0.7  | 0.9  | 0.8  | 0.7  | 0.3                                                   | -3.1 (-10.2, 4.5)                                     | -15.5                                     | 0.4153                         |

|                      |      |      |      |      |      |      |      |      |                      |        |         |
|----------------------|------|------|------|------|------|------|------|------|----------------------|--------|---------|
|                      |      |      |      |      |      |      |      |      |                      |        |         |
| <b>No Diabetes</b>   |      |      |      |      |      |      |      |      |                      |        |         |
| Prior CVD            | 0.2  | 0.6  | 0.5  | 0.3  | 0.8  | 1.1  | 0.1  | 0.1  | 7.2 (-8.4, 25.5)     | 36.1   | 0.3853  |
| No CVD               | 0.2  | 0.1  | 0.1  | 0.2  | 0.1  | 0.1  | 0.1  | 0.1  | -3.0 (-8.3, 2.6)     | -14.9  | 0.2890  |
|                      |      |      |      |      |      |      |      |      |                      |        |         |
| <b>45-64 years</b>   |      |      |      |      |      |      |      |      |                      |        |         |
| <b>Diabetes</b>      |      |      |      |      |      |      |      |      |                      |        |         |
| Prior CVD            | 11.4 | 10.6 | 9.5  | 8.5  | 8.1  | 7.9  | 7.9  | 3.5  | -6.5 (-9.2, -3.8)    | -32.7  | <0.0001 |
| No CVD               | 2.7  | 3.2  | 3.3  | 3.2  | 3.1  | 2.9  | 3.0  | -0.3 | -0.4 (-1.4, 0.6)     | -2.0   | 0.4466  |
|                      |      |      |      |      |      |      |      |      |                      |        |         |
| <b>No Diabetes</b>   |      |      |      |      |      |      |      |      |                      |        |         |
| Prior CVD            | 3.9  | 3.3  | 3.1  | 2.9  | 3.1  | 2.9  | 3.1  | 0.8  | -3.6 (-6.7, -0.4)    | -18.1  | 0.0282  |
| No CVD               | 1.1  | 1.1  | 1.2  | 1.1  | 1.0  | 1.0  | 1.0  | 0.1  | -1.6 (-3.0, -0.1)    | -7.9   | 0.0307  |
|                      |      |      |      |      |      |      |      |      |                      |        |         |
| <b>65+ years</b>     |      |      |      |      |      |      |      |      |                      |        |         |
| <b>Diabetes</b>      |      |      |      |      |      |      |      |      |                      |        |         |
| Prior CVD            | 20.5 | 20.0 | 19.7 | 18.5 | 17.0 | 17.4 | 16.3 | 4.2  | -3.8 (-5.2, -2.4)    | -19.2  | <0.0001 |
| No CVD               | 9.6  | 9.9  | 9.9  | 9.8  | 9.7  | 9.4  | 9.5  | 0.1  | -0.8 (-1.9, 0.4)     | -3.8   | 0.2059  |
|                      |      |      |      |      |      |      |      |      |                      |        |         |
| <b>No Diabetes</b>   |      |      |      |      |      |      |      |      |                      |        |         |
| Prior CVD            | 14.5 | 12.3 | 12.2 | 12.2 | 11.7 | 11.5 | 10.9 | 3.6  | -3.7 (-6.0, -1.2)    | -18.3  | 0.0032  |
| No CVD               | 5.7  | 5.8  | 6.3  | 6.2  | 6.1  | 6.3  | 6.0  | -0.3 | 0.8 (0.0, 1.6)       | 3.9    | 0.0638  |
|                      |      |      |      |      |      |      |      |      |                      |        |         |
| <b>Heart Failure</b> |      |      |      |      |      |      |      |      |                      |        |         |
| <b>20-44 years</b>   |      |      |      |      |      |      |      |      |                      |        |         |
| <b>Diabetes</b>      |      |      |      |      |      |      |      |      |                      |        |         |
| Prior CVD            | 38.4 | 20.9 | 13.6 | 13.8 | 9.1  | 7.9  | 8.6  | 29.8 | -25.3 (-35.4, -13.6) | -126.4 | <0.0001 |
| No CVD               | 0.9  | 1.3  | 0.8  | 1.0  | 0.9  | 0.9  | 1.0  | -0.1 | -1.0 (-6.2, 4.6)     | -4.9   | 0.7263  |
|                      |      |      |      |      |      |      |      |      |                      |        |         |
| <b>No Diabetes</b>   |      |      |      |      |      |      |      |      |                      |        |         |
| Prior CVD            | 1.0  | 0.2  | 2.6  | 2.8  | 0.2  | 0.3  | 1.2  | -0.2 | -5.5 (-15.4, 5.5)    | -27.7  | 0.3135  |
| No CVD               | 0.1  | 0.1  | 0.1  | 0.1  | 0.0  | 0.1  | 0.1  | 0.0  | -8.0 (-18.0, 3.2)    | -40.0  | 0.1541  |
|                      |      |      |      |      |      |      |      |      |                      |        |         |
| <b>45-64 years</b>   |      |      |      |      |      |      |      |      |                      |        |         |
| <b>Diabetes</b>      |      |      |      |      |      |      |      |      |                      |        |         |
| Prior CVD            | 27.9 | 27.6 | 26.3 | 21.1 | 20.3 | 18.4 | 17.8 | 10.1 | -8.1 (-9.7, -6.5)    | -40.6  | <0.0001 |
| No CVD               | 3.1  | 3.5  | 3.4  | 3.5  | 3.7  | 3.6  | 3.4  | -0.3 | 1.3 (-0.7, 3.3)      | 6.4    | 0.2037  |
|                      |      |      |      |      |      |      |      |      |                      |        |         |
| <b>No Diabetes</b>   |      |      |      |      |      |      |      |      |                      |        |         |
| Prior CVD            | 5.2  | 3.5  | 5.1  | 4.0  | 3.1  | 4.1  | 4.2  | 1.0  | -3.1 (-6.0, -0.1)    | -15.6  | 0.0401  |
| No CVD               | 0.5  | 0.5  | 0.5  | 0.4  | 0.5  | 0.5  | 0.5  | 0.0  | -0.4 (-1.9, 1.1)     | -2.2   | 0.5771  |



|                            |      |      |      |      |      |      |      |      |                      |       |         |  |
|----------------------------|------|------|------|------|------|------|------|------|----------------------|-------|---------|--|
|                            |      |      |      |      |      |      |      |      |                      |       |         |  |
| <b>65+ years</b>           |      |      |      |      |      |      |      |      |                      |       |         |  |
| <b>Diabetes</b>            |      |      |      |      |      |      |      |      |                      |       |         |  |
| Prior CVD                  | 53.1 | 49.0 | 47.3 | 46.9 | 42.9 | 43.0 | 40.7 | 12.4 | -4.0 (-5.5, -2.6)    | -20.2 | <0.0001 |  |
| No CVD                     | 10.2 | 11.9 | 12.6 | 12.7 | 12.7 | 13.0 | 13.3 | -3.1 | 2.6 (1.6, 3.5)       | 12.8  | <0.0001 |  |
|                            |      |      |      |      |      |      |      |      |                      |       |         |  |
| <b>No Diabetes</b>         |      |      |      |      |      |      |      |      |                      |       |         |  |
| Prior CVD                  | 18.1 | 17.5 | 16.3 | 15.8 | 15.4 | 16.3 | 14.0 | 4.1  | -3.4 (-4.9, -1.9)    | -17.2 | <0.0001 |  |
| No CVD                     | 3.4  | 3.9  | 3.9  | 4.2  | 4.2  | 4.2  | 4.5  | -1.1 | 3.4 (2.0, 4.8)       | 16.9  | <0.0001 |  |
|                            |      |      |      |      |      |      |      |      |                      |       |         |  |
| <b>All-cause Mortality</b> |      |      |      |      |      |      |      |      |                      |       |         |  |
| <b>20-44 years</b>         |      |      |      |      |      |      |      |      |                      |       |         |  |
| <b>Diabetes</b>            |      |      |      |      |      |      |      |      |                      |       |         |  |
| Prior CVD                  | 34.2 | 34.8 | 33.4 | 21.2 | 14.4 | 13.6 | -    | 20.6 | -18.5 (-23.1, -13.6) | -74.0 | <0.0001 |  |
| No CVD                     | 2.3  | 2.3  | 2.3  | 2.6  | 3.2  | 2.3  | -    | 0.0  | 3.8 (1.8, 5.8)       | 15.2  | <0.0001 |  |
|                            |      |      |      |      |      |      |      |      |                      |       |         |  |
| <b>No Diabetes</b>         |      |      |      |      |      |      |      |      |                      |       |         |  |
| Prior CVD                  | 3.7  | 3.0  | 3.1  | 7.9  | 1.6  | 3.4  | -    | 0.3  | -1.2 (-16.5, -16.8)  | -4.9  | 0.8857  |  |
| No CVD                     | 0.8  | 1.0  | 1.1  | 0.8  | 0.6  | 0.8  | -    | 0.0  | -4.6 (-8.3, -0.7)    | -18.4 | 0.0199  |  |
|                            |      |      |      |      |      |      |      |      |                      |       |         |  |
| <b>45-64 years</b>         |      |      |      |      |      |      |      |      |                      |       |         |  |
| <b>Diabetes</b>            |      |      |      |      |      |      |      |      |                      |       |         |  |
| Prior CVD                  | 31.0 | 27.4 | 27.0 | 24.7 | 21.1 | 19.8 | -    | 11.2 | -8.4 (-9.7, -7.1)    | -33.6 | <0.0001 |  |
| No CVD                     | 6.7  | 7.2  | 7.4  | 7.2  | 7.1  | 7.0  | -    | -0.3 | 0.2 (-0.3, 0.7)      | 0.7   | 0.4839  |  |
|                            |      |      |      |      |      |      |      |      |                      |       |         |  |
| <b>No Diabetes</b>         |      |      |      |      |      |      |      |      |                      |       |         |  |
| Prior CVD                  | 15.0 | 10.1 | 9.4  | 8.6  | 9.2  | 7.9  | -    | 7.1  | -10.6 (-12.9, -8.1)  | -42.2 | <0.0001 |  |
| No CVD                     | 3.4  | 3.4  | 3.4  | 3.3  | 3.2  | 3.1  | -    | 0.3  | -1.9 (-5.0, 1.2)     | -7.8  | 0.2228  |  |
|                            |      |      |      |      |      |      |      |      |                      |       |         |  |
| <b>65+ years</b>           |      |      |      |      |      |      |      |      |                      |       |         |  |
| <b>Diabetes</b>            |      |      |      |      |      |      |      |      |                      |       |         |  |
| Prior CVD                  | 87.0 | 78.8 | 76.2 | 74.7 | 69.8 | 67.6 | -    | 19.4 | -4.6 (-5.3, -3.9)    | -18.5 | <0.0001 |  |
| No CVD                     | 37.0 | 38.4 | 37.5 | 38.0 | 35.4 | 35.5 | -    | 1.5  | -1.3 (-2.0, -0.7)    | -5.4  | <0.0001 |  |
|                            |      |      |      |      |      |      |      |      |                      |       |         |  |
| <b>No Diabetes</b>         |      |      |      |      |      |      |      |      |                      |       |         |  |
| Prior CVD                  | 57.0 | 50.2 | 48.4 | 45.5 | 43.7 | 42.5 | -    | 14.5 | -5.5 (-6.2, -4.8)    | -21.9 | <0.0001 |  |
| No CVD                     | 25.7 | 27.3 | 26.4 | 26.2 | 25.3 | 25.1 | -    | 0.6  | -1.1 (-2.4, 0.1)     | -4.6  | 0.0693  |  |



|                    |       |       |       |       |       |       |     |      |                   |      |         |
|--------------------|-------|-------|-------|-------|-------|-------|-----|------|-------------------|------|---------|
| <b>Mortality</b>   |       |       |       |       |       |       |     |      |                   |      |         |
| <b>Diabetes</b>    |       |       |       |       |       |       |     |      |                   |      |         |
| 20-44 yrs          | 3.84  | 3.31  | 3.5   | 3.45  | 3.61  | 3.22  | --- | 0.62 | -1.8 (-2.9, -0.6) | 8.5  | 0.0021  |
| 45-64 yrs          | 11.44 | 11.24 | 10.92 | 10.22 | 9.76  | 9.67  | --- | 1.77 | -3.7 (-4.5, -3.0) | 17.3 | <0.0001 |
| ≥ 65 yr            | 58.7  | 56.12 | 55.02 | 54.73 | 51.07 | 50    | --- | 8.7  | -3.1 (-4.1, -2.1) | 14.4 | <0.0001 |
|                    |       |       |       |       |       |       |     |      |                   |      |         |
| <b>No Diabetes</b> |       |       |       |       |       |       |     |      |                   |      |         |
| 20-44 yrs          | 1.19  | 1.1   | 1.21  | 1.13  | 0.94  | 0.92  | --- | 0.27 | -5.0 (-6.8, -3.1) | 22.5 | <0.0001 |
| 45-64 yrs          | 4.6   | 4.29  | 4.18  | 4.18  | 4.09  | 3.86  | --- | 0.74 | -2.9 (-5.2, -0.5) | 13.6 | 0.0180  |
| ≥ 65 yr            | 35.71 | 35.2  | 35.03 | 34.6  | 33.53 | 33.44 | --- | 2.27 | -1.4 (-2.0, -0.8) | 6.7  | <0.0001 |

Table S6. Annual rates of major cardiovascular events and all-cause mortality from 2005 through 2011 for persons with and without diabetes by race/ethnicity. Age- and sex-adjusted to the 2010 U.S. Census population.

| Outcome              | Rates per 1,000 person*years |       |       |       |       |       |       | 2005 to 2011<br>Events<br>difference per<br>1,000 p*y | Poisson Annual<br>Relative Rate<br>Change<br>(95% CI) | 2005 to 2011<br>Relative<br>Reduction<br>(%) | Test for<br>Trend<br>(p-value) |
|----------------------|------------------------------|-------|-------|-------|-------|-------|-------|-------------------------------------------------------|-------------------------------------------------------|----------------------------------------------|--------------------------------|
|                      | 2005                         | 2006  | 2007  | 2008  | 2009  | 2010  | 2011  |                                                       |                                                       |                                              |                                |
| <b>AMI/ACS</b>       |                              |       |       |       |       |       |       |                                                       |                                                       |                                              |                                |
| <b>Diabetes</b>      |                              |       |       |       |       |       |       |                                                       |                                                       |                                              |                                |
| White                | 7.13                         | 6.63  | 6.2   | 5.77  | 5.25  | 4.91  | 4.66  | 2.47                                                  | -7.0 (-8.9, -5.0)                                     | 35.1                                         | <0.0001                        |
| Hispanic             | 6.97                         | 6.56  | 5.61  | 5.28  | 4.53  | 4.48  | 4.71  | 2.26                                                  | -7.3 (-10.0, -4.6)                                    | 36.7                                         | <0.0001                        |
| Black                | 6.61                         | 6.3   | 6.15  | 5.51  | 4.78  | 4.73  | 4.8   | 1.81                                                  | -6.0 (-7.9, -4.1)                                     | 31.0                                         | <0.0001                        |
| Asian                | 5.89                         | 5.26  | 4.83  | 5.38  | 4.16  | 4.11  | 3.79  | 2.10                                                  | -6.7 (-9.5, -3.9)                                     | 34.1                                         | <0.0001                        |
|                      |                              |       |       |       |       |       |       |                                                       |                                                       |                                              |                                |
| <b>No Diabetes</b>   |                              |       |       |       |       |       |       |                                                       |                                                       |                                              |                                |
| White                | 2.58                         | 2.57  | 2.23  | 2.23  | 2.06  | 2     | 1.81  | 0.77                                                  | -5.7 (-7.0, -4.3)                                     | 29.5                                         | <0.0001                        |
| Hispanic             | 2.32                         | 2.37  | 2.2   | 1.95  | 1.97  | 1.62  | 1.73  | 0.59                                                  | -5.8 (-9.1, -2.5)                                     | 30.3                                         | 0.0007                         |
| Black                | 3.05                         | 2.3   | 2.47  | 1.99  | 2.07  | 1.96  | 2.38  | 0.67                                                  | -4.1 (-6.2, -2.0)                                     | 28.7                                         | 0.0002                         |
| Asian                | 1.99                         | 1.95  | 1.91  | 1.75  | 1.55  | 1.49  | 1.56  | 0.43                                                  | -4.9 (-7.7, -2.0)                                     | 25.8                                         | 0.0011                         |
|                      |                              |       |       |       |       |       |       |                                                       |                                                       |                                              |                                |
| <b>Stroke</b>        |                              |       |       |       |       |       |       |                                                       |                                                       |                                              |                                |
| <b>Diabetes</b>      |                              |       |       |       |       |       |       |                                                       |                                                       |                                              |                                |
| White                | 4.67                         | 4.47  | 4.22  | 4.13  | 4.32  | 4.01  | 3.73  | 0.94                                                  | -3.0 (-4.7, -1.2)                                     | 16.5                                         | 0.0014                         |
| Hispanic             | 5.23                         | 4.77  | 4.97  | 4.47  | 4.31  | 4.01  | 3.88  | 1.35                                                  | -4.8 (-5.5, -4.2)                                     | 25.8                                         | <0.0001                        |
| Black                | 5.67                         | 6.01  | 5.66  | 5.94  | 5.46  | 6.05  | 5.45  | 0.22                                                  | -0.3 (-2.0, 1.4)                                      | 1.8                                          | 0.7227                         |
| Asian                | 3.72                         | 3.72  | 3.65  | 4.08  | 3.3   | 3.32  | 3.43  | 0.29                                                  | -2.0 (-6.4, 2.6)                                      | 11.3                                         | 0.3922                         |
|                      |                              |       |       |       |       |       |       |                                                       |                                                       |                                              |                                |
| <b>No Diabetes</b>   |                              |       |       |       |       |       |       |                                                       |                                                       |                                              |                                |
| White                | 2.15                         | 2.02  | 2.05  | 2.09  | 1.85  | 1.94  | 1.68  | 0.47                                                  | -2.5 (-3.6, -1.4)                                     | 14.3                                         | <0.0001                        |
| Hispanic             | 2.53                         | 1.96  | 2.25  | 2.35  | 2.02  | 2.05  | 1.74  | 0.79                                                  | -1.8 (-3.1, -0.5)                                     | 10.5                                         | 0.0069                         |
| Black                | 3.04                         | 2.72  | 2.76  | 2.83  | 2.81  | 2.75  | 3.44  | -0.40                                                 | -1.5 (-2.3, -0.7)                                     | 8.7                                          | 0.0004                         |
| Asian                | 2.09                         | 1.59  | 1.77  | 2     | 1.86  | 1.91  | 1.02  | 1.07                                                  | 1.4 (-4.2, 7.4)                                       | 9.0                                          | 0.6200                         |
|                      |                              |       |       |       |       |       |       |                                                       |                                                       |                                              |                                |
| <b>Heart Failure</b> |                              |       |       |       |       |       |       |                                                       |                                                       |                                              |                                |
| <b>Diabetes</b>      |                              |       |       |       |       |       |       |                                                       |                                                       |                                              |                                |
| White                | 8.75                         | 8.27  | 7.79  | 7.27  | 6.93  | 6.67  | 6.24  | 2.51                                                  | -5.1 (-6.1, -4.1)                                     | 27.0                                         | 0.0002                         |
| Hispanic             | 8.76                         | 8.88  | 8.3   | 8.15  | 7.64  | 6.84  | 6.65  | 2.11                                                  | -5.1 (-6.8, -3.4)                                     | 27.0                                         | <0.0001                        |
| Black                | 17.55                        | 15.08 | 13.42 | 13.59 | 12.13 | 12.36 | 12.16 | 5.39                                                  | -5.5 (-8.7, -2.2)                                     | 28.6                                         | 0.0014                         |
| Asian                | 4.73                         | 4.44  | 4.66  | 4.19  | 3.98  | 4.59  | 4.44  | 0.29                                                  | -0.9 (-1.5, 0.3)                                      | 5.1                                          | 0.0053                         |
|                      |                              |       |       |       |       |       |       |                                                       |                                                       |                                              |                                |
| <b>No Diabetes</b>   |                              |       |       |       |       |       |       |                                                       |                                                       |                                              |                                |
| White                | 1.92                         | 1.94  | 1.85  | 1.78  | 1.73  | 1.69  | 1.68  | 0.24                                                  | -2.6 (-4.3, -0.9)                                     | 14.7                                         | 0.0807                         |
| Hispanic             | 2.14                         | 1.96  | 1.68  | 1.93  | 1.62  | 2.13  | 1.74  | 0.40                                                  | -1.6 (-2.9, -0.1)                                     | 9.0                                          | 0.0027                         |
| Black                | 3.08                         | 2.87  | 3.72  | 3.21  | 2.7   | 3.6   | 3.44  | -0.36                                                 | 1.8 (-2.0, 5.7)                                       | 11.4                                         | 0.0970                         |

|                            |       |       |       |       |       |       |      |      |                   |      |         |
|----------------------------|-------|-------|-------|-------|-------|-------|------|------|-------------------|------|---------|
| Asian                      | 1.29  | 1.19  | 1.16  | 1.2   | 1.49  | 1.28  | 1.02 | 0.27 | -1.1 (-2.1, -0.1) | 6.5  |         |
| <b>All-cause Mortality</b> |       |       |       |       |       |       |      |      |                   |      |         |
| <b>Diabetes</b>            |       |       |       |       |       |       |      |      |                   |      |         |
| White                      | 18.6  | 16.73 | 16.73 | 16.53 | 15.85 | 15.65 | ---  | 2.95 | -2.8 (-5.4, -0.1) | 13.2 | 0.0419  |
| Hispanic                   | 14.85 | 14.72 | 13.63 | 12.92 | 12.33 | 12.06 | ---  | 2.79 | -4.5 (-7.2, -1.8) | 20.6 | 0.0014  |
| Black                      | 18.08 | 18.49 | 17.18 | 18.22 | 16.93 | 15.81 | ---  | 2.27 | -2.5 (-3.3, -1.7) | 11.9 | <0.0001 |
| Asian                      | 11.34 | 10.66 | 10.73 | 9.8   | 9.74  | 9.46  | ---  | 1.88 | -3.6 (-6.9, -0.1) | 16.6 | 0.0461  |
| <b>No Diabetes</b>         |       |       |       |       |       |       |      |      |                   |      |         |
| White                      | 9.05  | 8.96  | 8.43  | 8.36  | 8.12  | 8.12  | ---  | 0.93 | -2.3 (-5.5, 1.0)  | 11.0 | 0.1677  |
| Hispanic                   | 7.98  | 7.94  | 8.12  | 6.76  | 6.71  | 6.71  | ---  | 1.27 | -4.3 (-8.4, -0.0) | 19.9 | 0.0483  |
| Black                      | 10.59 | 9.17  | 9.25  | 9.11  | 9.15  | 10.27 | ---  | 0.32 | -0.2 (-1.8, 1.4)  | 1.1  | 0.7830  |
| Asian                      | 6.12  | 6.15  | 5.71  | 5.93  | 5.22  | 5.17  | ---  | 0.95 | -3.6 (-7.8, 0.7)  | 17.0 | 0.1021  |

## Study Group List for use in Published Papers

### Key:

PI: Principal Investigator

Co-I: Co-Investigator

PM: Project Manager

B: Biostatistician

PC: Project Coordinator

P: Programmer

DA: Data Analyst

---

This statement must be used in all publications and presentations: "This project was supported by grant number R01HS019859 from the Agency for Healthcare Research and Quality. The content is solely the responsibility of the authors and does not necessarily represent the official views of the Agency for Healthcare Research and Quality."

Kaiser Permanente Colorado Institute for Health Research: **John F. Steiner, MD, MPH, (Overall PI)**: Senior Director, Institute for Health Research, Kaiser Permanente Colorado, Institute for Health Research, Kaiser Permanente Colorado, PO Box 378066, Denver, CO 80237, Phone: 303-614-1374, Fax: 303-614-1295, Email: john.f.steiner@kp.org; **Andrea R. Paolino, MA, (Overall PM)**: Project Manager II, Institute for Health Research, Kaiser Permanente Colorado, Institute for Health Research, Kaiser Permanente Colorado, PO Box 378066, Denver, CO 80237, Phone: 303-614-1284, Fax: 303-614-1295, Email: andrea.paolino@kp.org; **Marsha Raebel, PharmD (PI)**: Senior Investigator, Pharmacotherapy, Institute for Health Research, Kaiser Permanente Colorado, PO Box 378066, Denver, CO 80237, Phone: (303) 614-1260, Fax: (303) 614-1265, Email: marsha.a.raebel@kp.org, Clinical Professor, University of Colorado Skaggs School of Pharmacy and Pharmaceutical Sciences, Aurora, Colorado, USA; **Stan Xu, PhD (Co-I)**: Head of Biostatistics/Investigator Institute for Health Research, Kaiser Permanente Colorado, PO Box 378066, Denver, CO 80237, Phone: (303) 614-1210, Fax: (303) 614-1305, Email: stan.xu@kp.org; **Emily Schroeder, MD, PhD (Co-I)**: Investigator, Institute for Health Research, Endocrinologist, Kaiser Permanente Colorado, PO Box 378066, Denver, CO 80237, Phone: (303) 614-1396, Fax: (303) 614-1305, Email: emily.x.schroeder@kp.org, Assistant Professor, University of Colorado School of Medicine, Aurora, Colorado, USA; **William (Troy) Donahoo, MD, FTOS**, Department of Metabolic-Surgical Weight Management, Physician Co-Lead, Specialized Nutrition Support Team, Physician Nutrition Specialist **(Co-I)**; **Michael Shainline, MS, MBA (PM)**: Project Manager, Institute for Health Research, Kaiser Permanente Colorado, Institute for Health Research, Kaiser Permanente Colorado, PO Box 378066, Denver, CO 80237, Phone: 303-614-1221, Fax: 303-614-1295, Email: michael.r.shainline@kp.org; **Christina Clarke, BS (P)**: Biostatistician, Institute for Health Research, Kaiser Permanente Colorado, Institute for Health Research, Kaiser Permanente Colorado, PO Box 378066, Denver, CO 80237, Phone: 303-614-1251, Fax: 303-614-1295, Email: christina.l.clarke@kp.org; **Glenn Goodrich, MS (P)**: Data Specialist/SAS Programmer II, Institute for Health Research, Kaiser Permanente Colorado, PO Box 378066, Denver, CO 80237, Phone: 303-614-1240, Fax: 303-614-1305, Email: glenn.k.goodrich@kp.org; **Jennifer L. Ellis, MBA, MSPH (B)**: Manager of Analytic Resources/Biostatistician, Institute for Health Research, Kaiser Permanente Colorado, PO Box 378066, Denver, CO 80237, Phone: 303-614-1258, Fax: 303-614-1305, Email: jenn.l.ellis@kp.org; **J. David Powers, MS (B)**: Biostatistician, Institute for Health Research, Kaiser Permanente Colorado, PO Box 378066, Denver, CO 80237, Phone: 303-614-1331, Fax: 303-614-1305, Email: j.david.powers@kp.org; **Chan Zeng, PhD, (B)**: Senior Biostatistician, Institute for Health Research, Kaiser Permanente Colorado, PO Box 378066, Denver, CO 80237, Phone: 303-614-1356, Fax: 303-614-1305, Email: chan.x.zeng@kp.org

Group Health Research Institute: **Katherine M. Newton, PhD (PI)**: Associate Director for Research and External Affairs, Group Health Research Institute, Metropolitan Park East, 1730 Minor Avenue, Ste. 1600 Seattle, WA 98101, Phone: 206-287-2973, Fax: 206-287-2871, E-mail: newton.k@ghc.org; **Leo S. Morales, MD, PhD, FACP (Co-I)**; **Do Peterson, MS (B)**; **Gabrielle Gundersen, BA (PM)**; **Luesa Jordan (P)**; **Bill Tolbert, MA (P)**

Geisinger Health System: **H. Lester Kirchner, PhD (PI):** Director, Biostatistics, Geisinger Health System 100 N. Academy Ave., 44-00, Danville, PA 17822, Phone: 570-214-8125, Fax: 570-314-5170, Email: hlkirchner@geisinger.edu; **Ronald Harris, MD (Co-I); Annemarie Hirsch, PhD, MPH (Co-I); Rebecca (Becky) Stametz, MPH (PM); Pinky Barua, MS, MBA, BS (DA/P); Diane Littlewood (Dir., Health Mgr); Keith Needham (GHP, DA)**

Henry Ford Health System: **Abraham Thomas, MD, MPH (PI-HFHS); Jennifer Elston Lafata, PhD (PI-VCU); Renee Atkinson, MBA (PC); Nonna Akkerman, BCS (P); Aida Li, MCS (P)**

HealthPartners HealthPartners: **Patrick O'Connor, MD, MA, MPH (PI):** Senior Clinical Investigator, HealthPartners Institute for Education and Research, 8170 33rd Ave. S., Minneapolis, MN 55425, Phone: 952-967-5034, Fax: 952-637-5022, Email: patrick.j.oconnor@healthpartners.com; **Jay Desai, PhD, MPH (Co-I); Nancy Sherwood, PhD (Co-I); Gabriela Vazquez Benitez, PhD, MSc (Co-I); Kris Ohnsorg, RN, MPH (PM); Emily D. Parker, PhD, MPH (DA); Mary Becker, BA (P); Renuka Adibhatla, MS (P); Zhiyuan Xu, BS (DA)**

Kaiser Permanente Hawaii: **Beth Waitzfelder, PhD (PI); Rebecca Williams, DrPH, MPH (PM); John Parker, BS (P)**

Kaiser Permanente Northern California: **Julie Schmittiel, PhD (PI):** Research Scientist, Director, Health Delivery Systems Center for Diabetes Translational Research (P30 DK092924), Associate Director, Kaiser Permanente Delivery Science Fellowship Program, Kaiser Permanente Northern California Division of Research, 2000 Broadway, Oakland, CA 94612, Phone: (510) 891-3872, Email: julie.a.schmittiel@kp.org; **Andrew J. Karter, PhD (Co-I); Romain Neugebauer, PhD (B); Assiamira Ferrara, MD, PhD (CoI); Deanne Wiley, BA (PM); Wendy Dyer, MS (Sr DA); Zheng Zhu (P)**

Kaiser Permanente Northwest: **Gregory A. Nichols, PhD (PI):** Senior Investigator, Kaiser Permanente Center for Health Research, 3800 N. Interstate Avenue, Portland, OR 97227-1098, Phone: 503-335-6733, Fax: 503-335-6311, E-mail: greg.nichols@kpchr.org; **Brian Hazlehurst, PhD (Co-I); Erin LeBlanc, MD, MPH (Co-I); Daniel S. Sapp (PM); Stephen Kurtz (PM); Teresa M. Kimes, MS (P); Chuhe Chen, PhD (P)**

Kaiser Permanente Southern California: **Jean M. Lawrence, ScD, MPH, MSSA (PI):** Research Scientist III / Epidemiologist, Department of Research & Evaluation, Kaiser Permanente Southern California, 100 S. Los Robles, 4<sup>th</sup> Floor, Pasadena CA 91101, Phone: 626-564-3106, Fax: 626-564-3403, E-mail: jean.m.lawrence@kp.org; **Melissa Preciado, MPH (PC); Harp Takhar, MPH (PM); Jian Zhang, MS (B); Joanie Chung, MPH (P)**

Kaiser Permanente Georgia: **Melissa Butler, PharmD, MPH, PhD, BCPS (PI):** Assistant Investigator, Center for Health Research Southeast, Kaiser Permanente Georgia, 3495 Piedmont Road, NE, Nine Piedmont Center Atlanta, GA 30305-1736, Phone: 404-364-4725, Fax: 404-364-7361, E-mail: melissa.g.butler@kp.org; **Dzifa Adjaye-Gbewonyo, MPH, CPH (PM); Anping Chang, MS, MPH (P); Junling Ren, MEd (P)**

Marshfield Clinic: **Ram D. Pathak, MD, FACP (PI); Amit Acharya, BDS, MS, PhD (Co-I); Valerie McManus, MPH (PM/P); Jay Fuehrer, BBA (P)**

Johns Hopkins University: **Jodi Segal, MD, MPH (PI):** Associate Professor of Medicine, Johns Hopkins University School of Medicine, 624 N. Broadway Room 644, Baltimore, MD 21205, Phone: 410-955-9866 Fax: 410-955-0825, Email: jsegal@jhmi.edu.

University of Michigan: **Michele Heisler, MD, MPA (PI)**
